# Supplementary figures and images for: High-resolution volumetric imaging constrains compartmental models to explore synaptic integration and temporal processing by cochlear nucleus globular bushy cells
Source: eLife journal article supplement (doi:10.7554/elife.83393), 2023-06-08

**GBC17  
D**

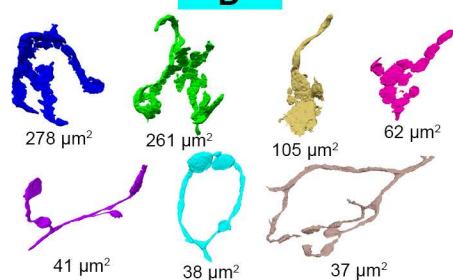

**GBC18  
L**

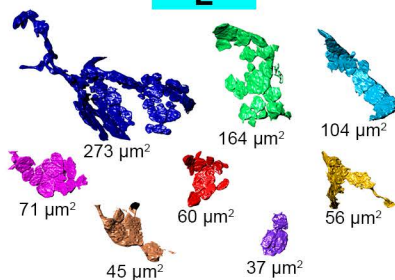

**GBC27**

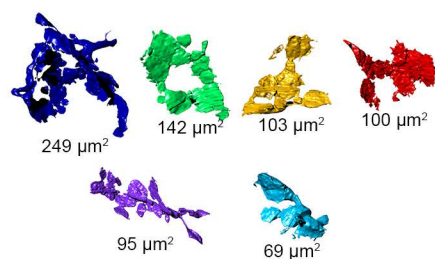

**GBC09  
M**

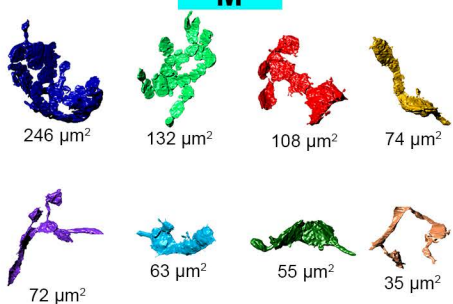

**GBC14**

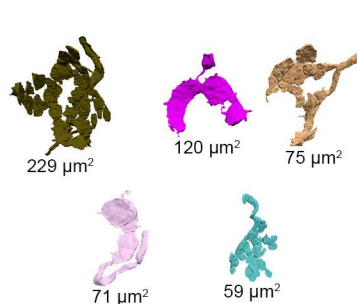

**GBC11  
M**

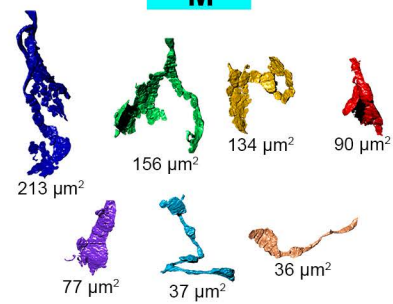

**GBC08**

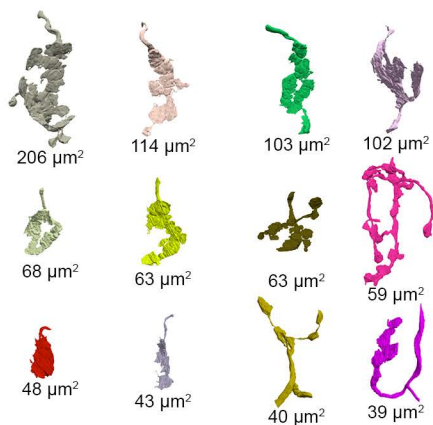

**GBC16**

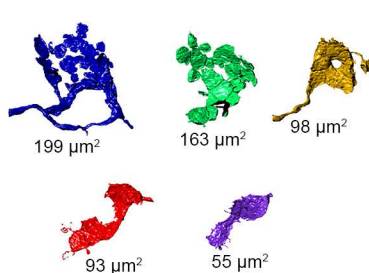

**GBC24**

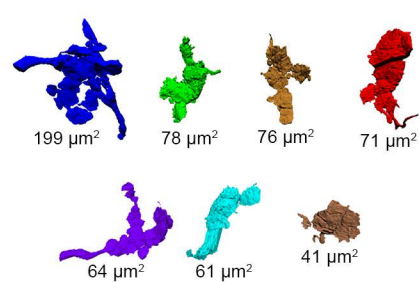

Supplement: supp [file elife-83393-supp-v1.zip]

**dB SPL: 15**

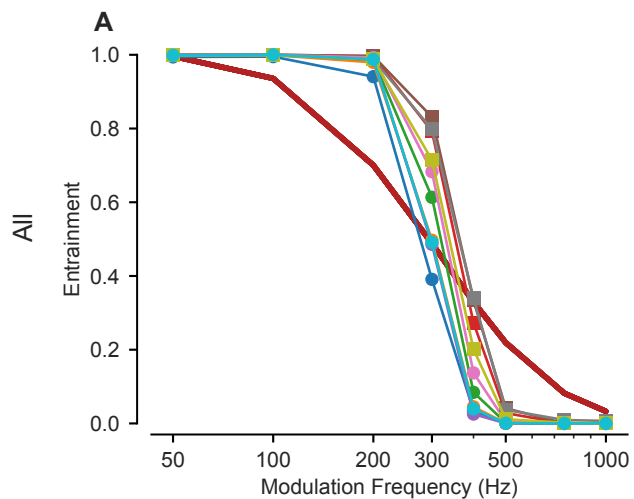

**dB SPL: 30**

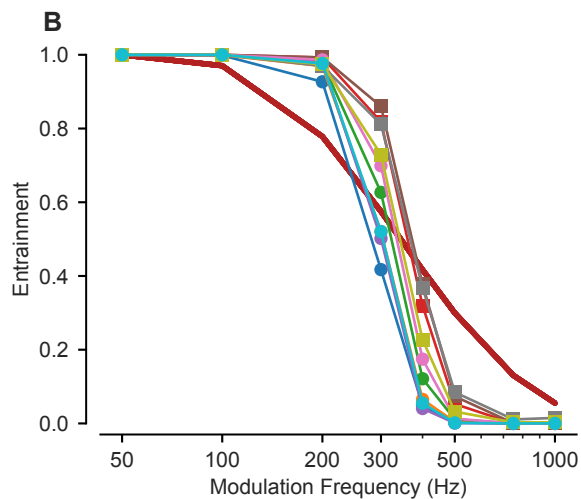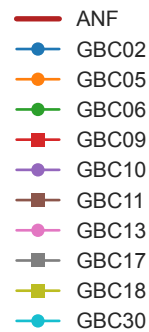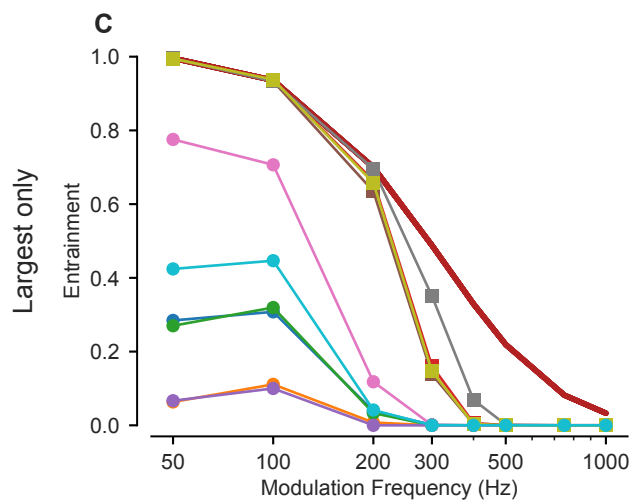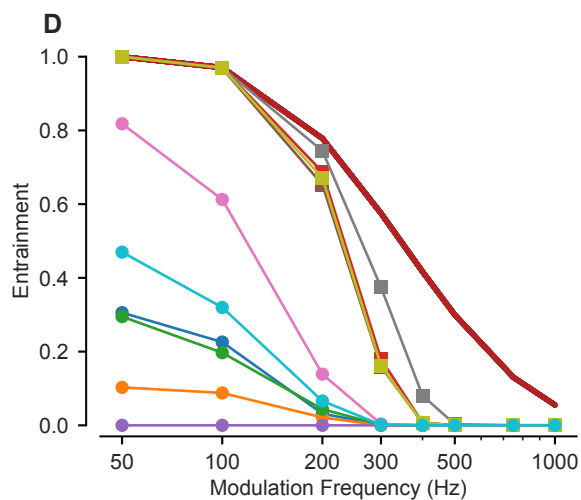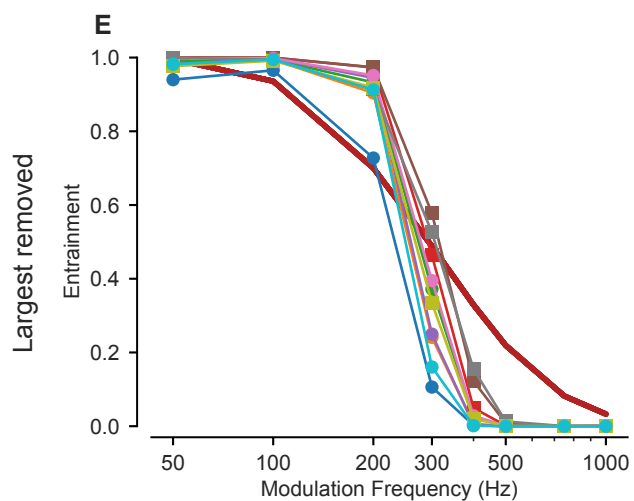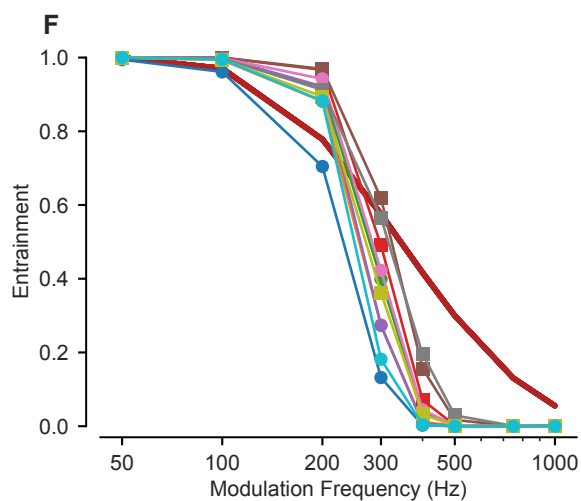

Supplement: supp [file elife-83393-supp-v1.zip]

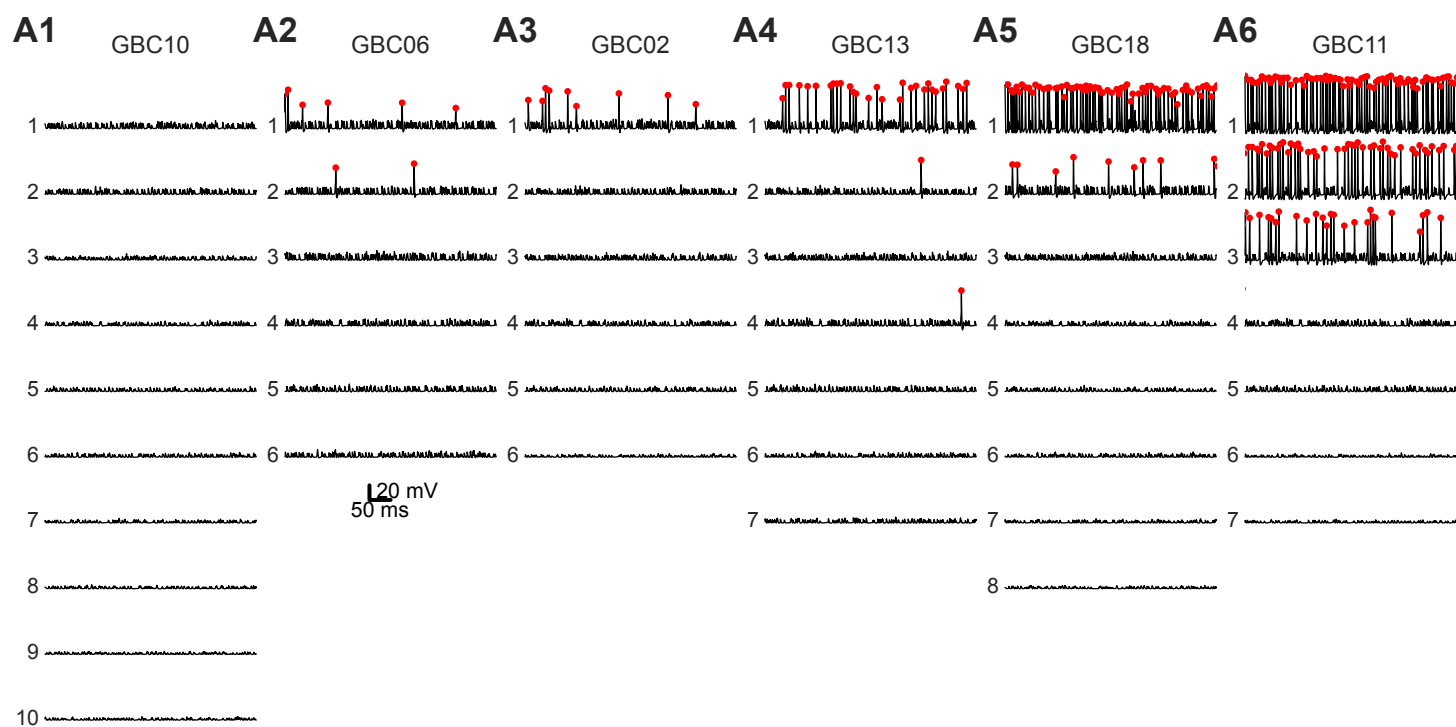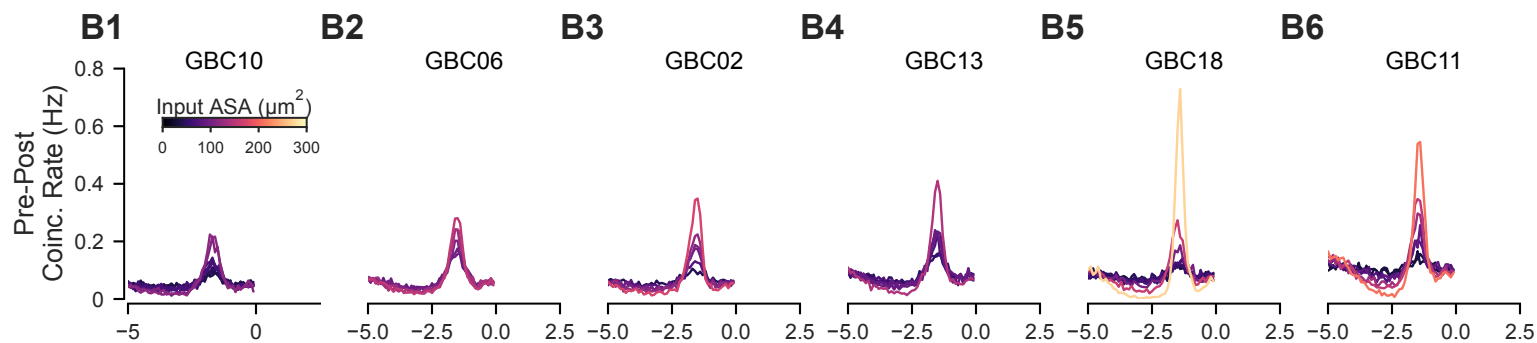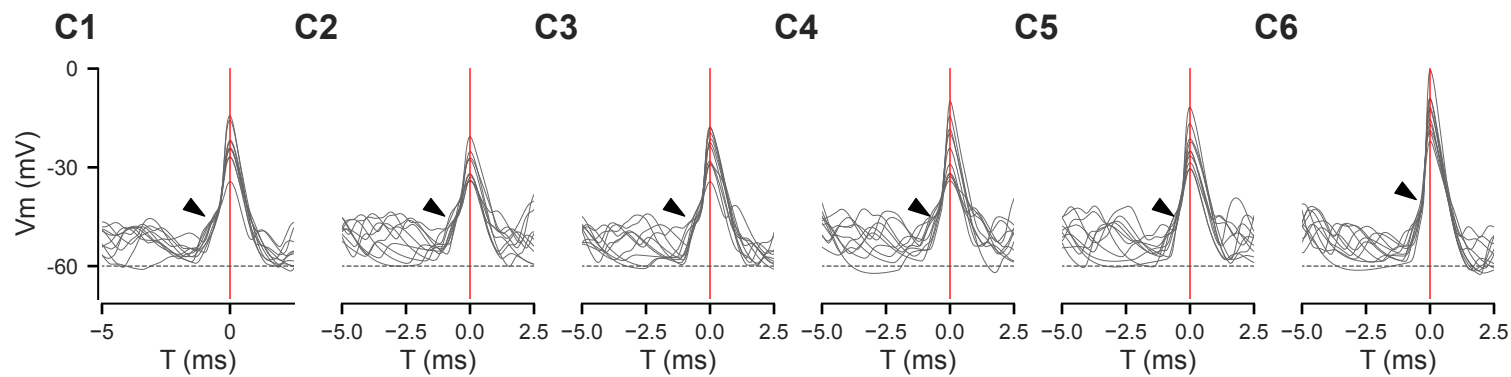

Supplement: supp [file elife-83393-supp-v1.zip]

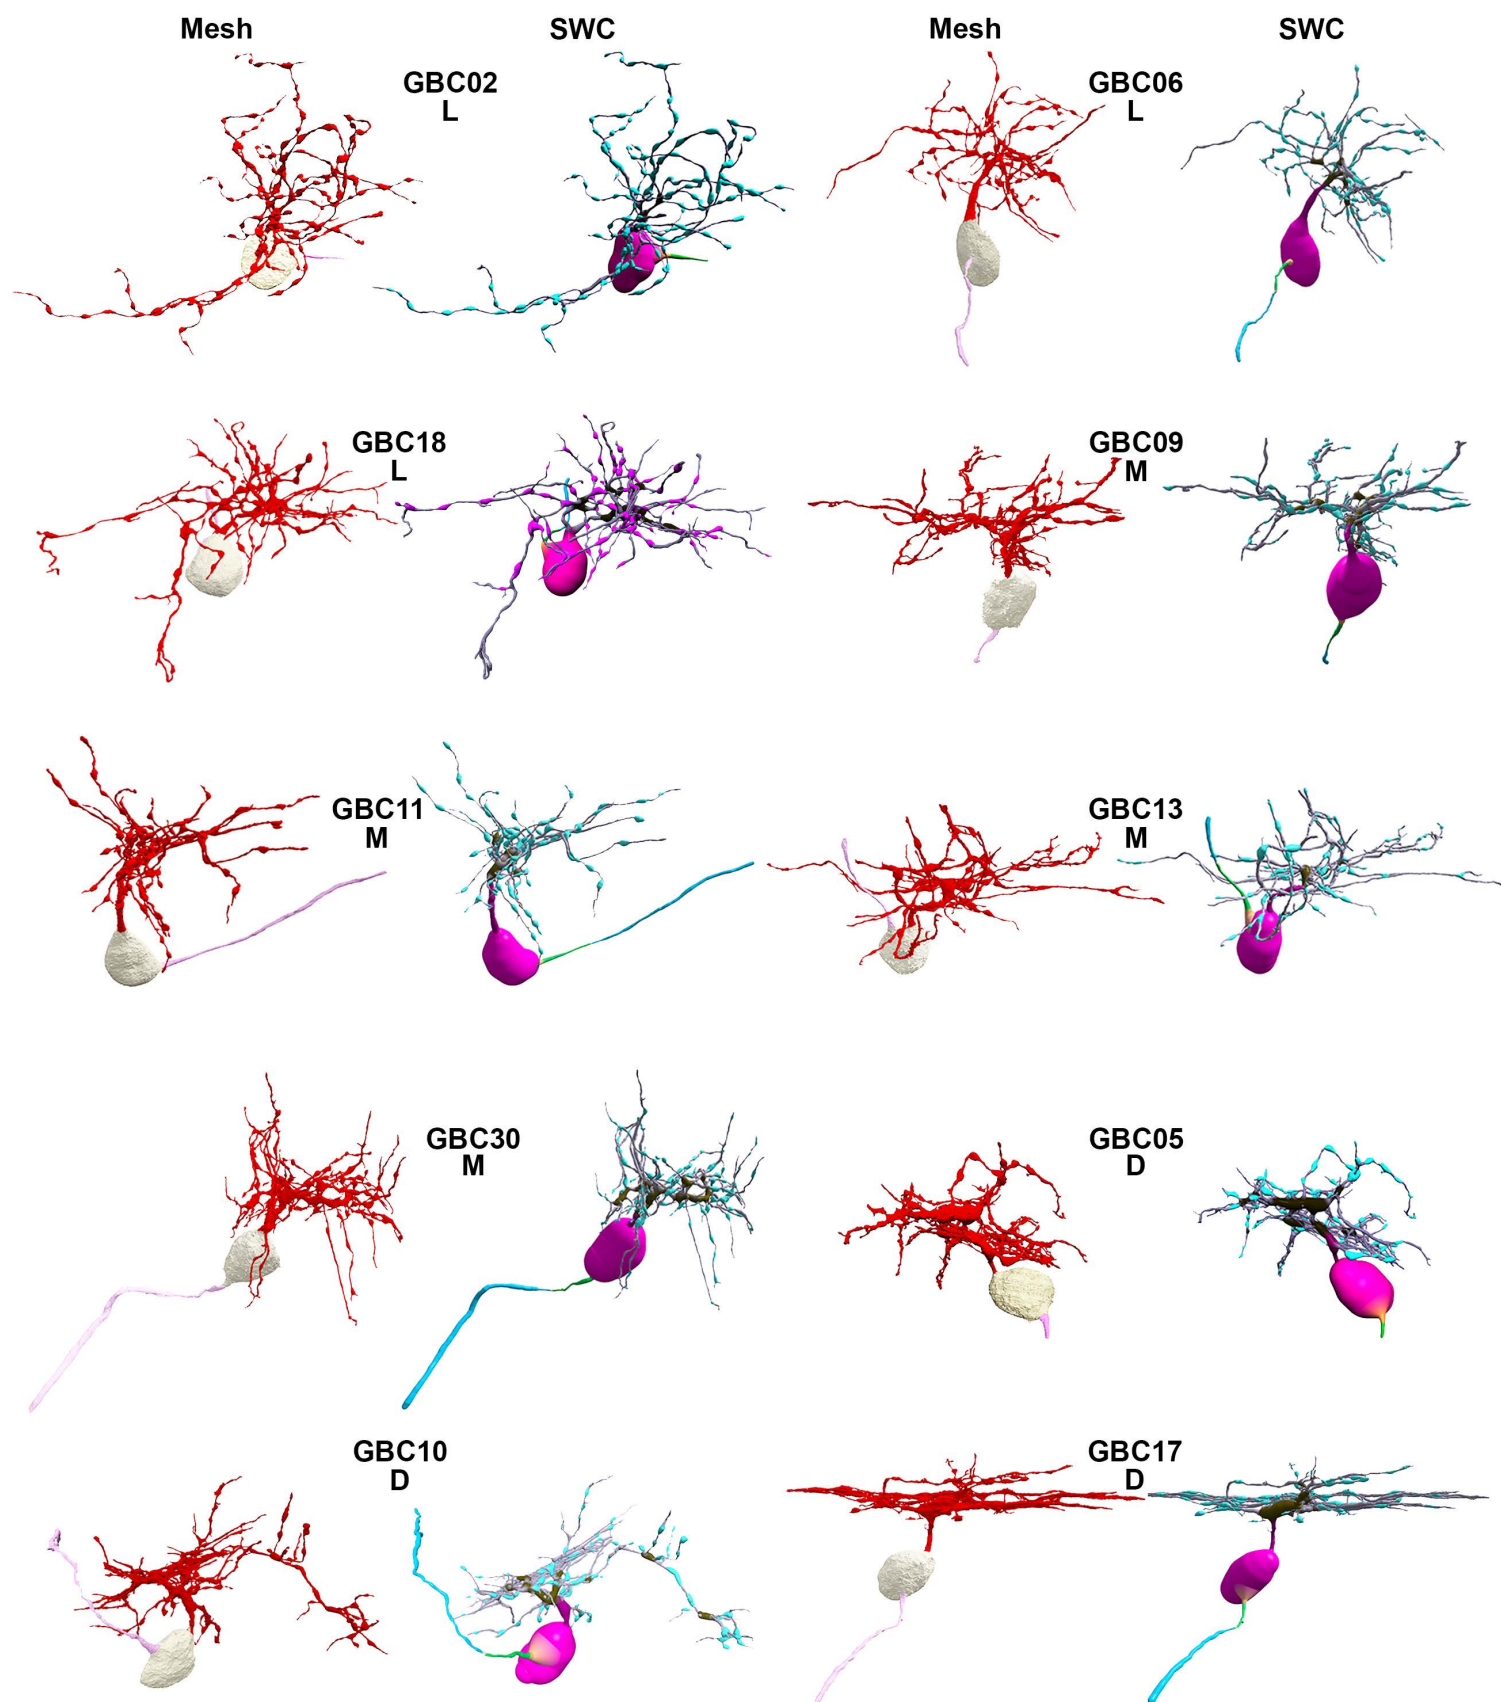

**Legend for SWC Images**

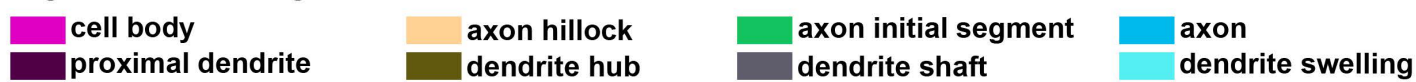

Supplement: supp [file elife-83393-supp-v1.zip]

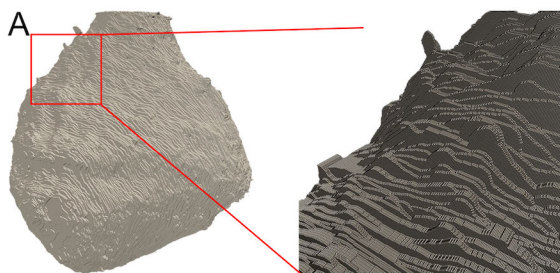

↓ GAMer2

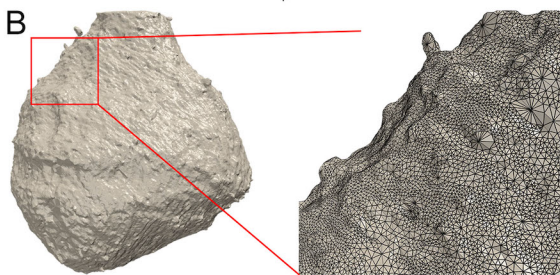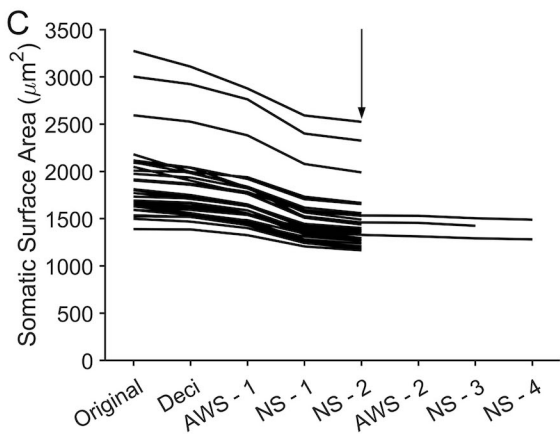

Supplement: supp [file elife-83393-supp-v1.zip]

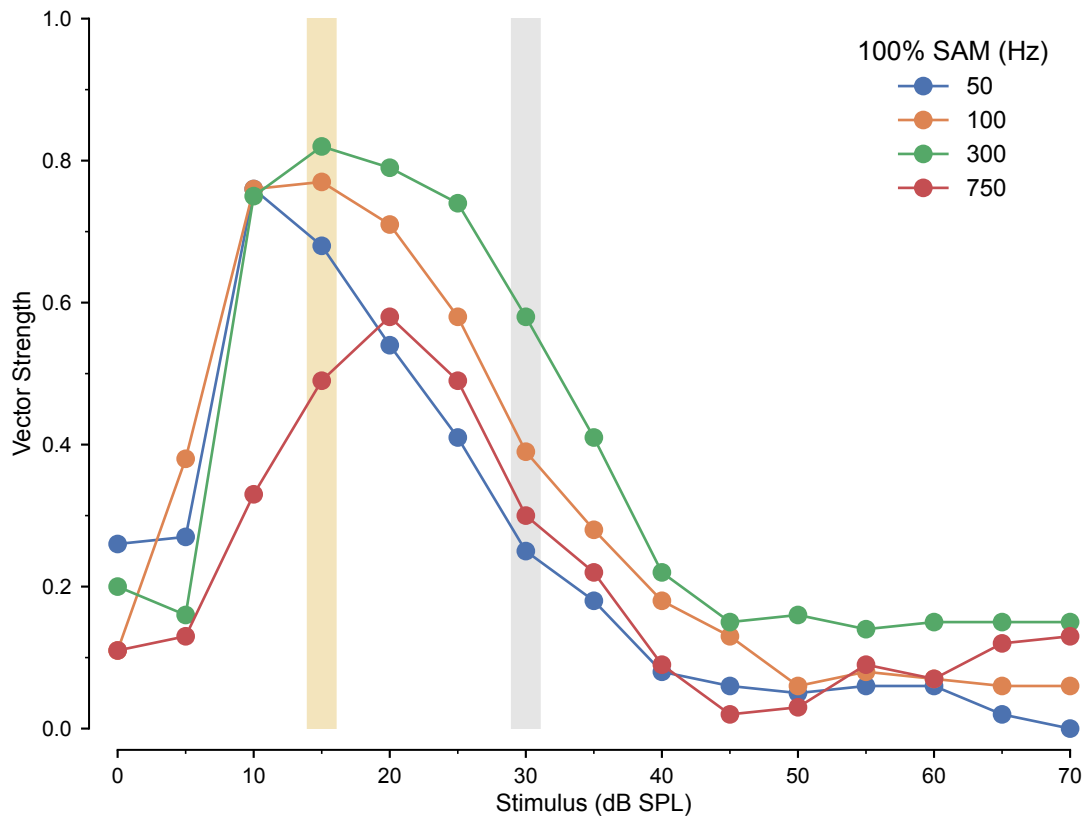

Supplement: supp [file elife-83393-supp-v1.zip]

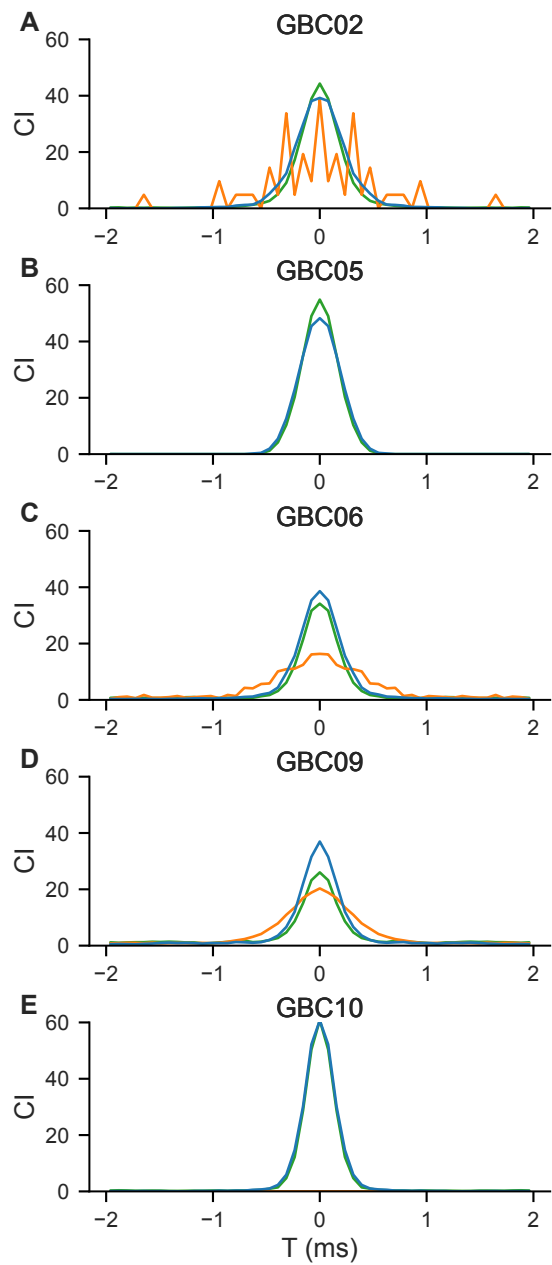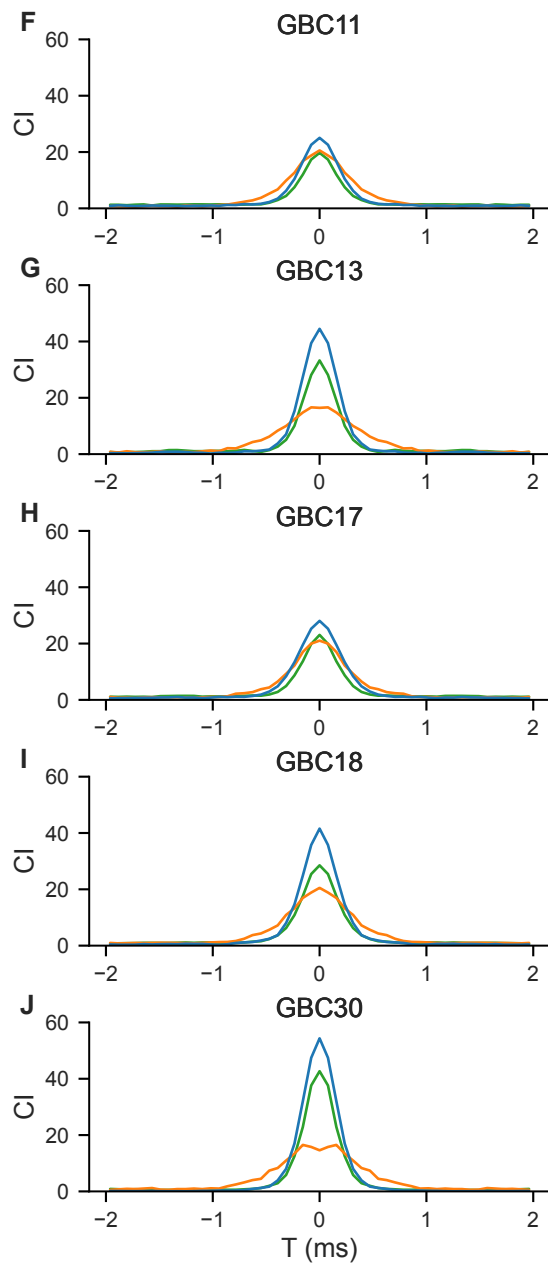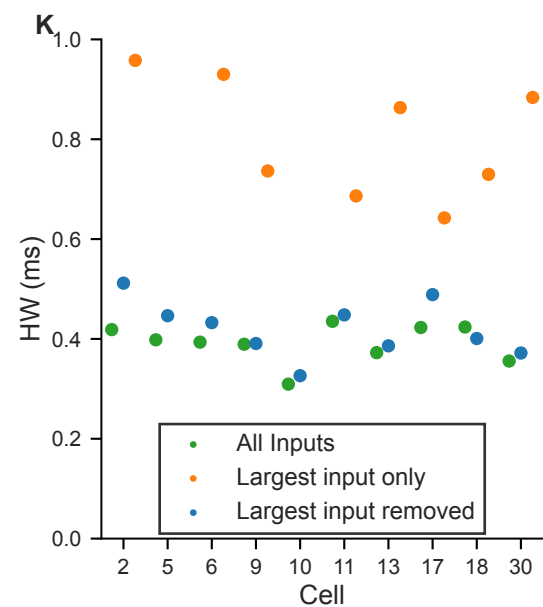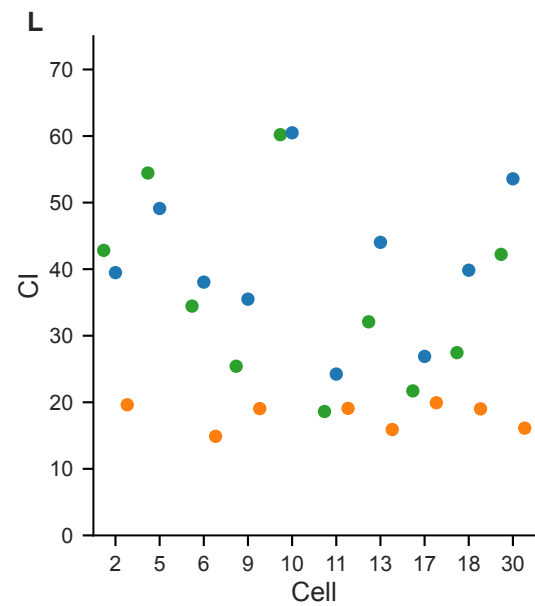

Supplement: supp [file elife-83393-supp-v1.zip]

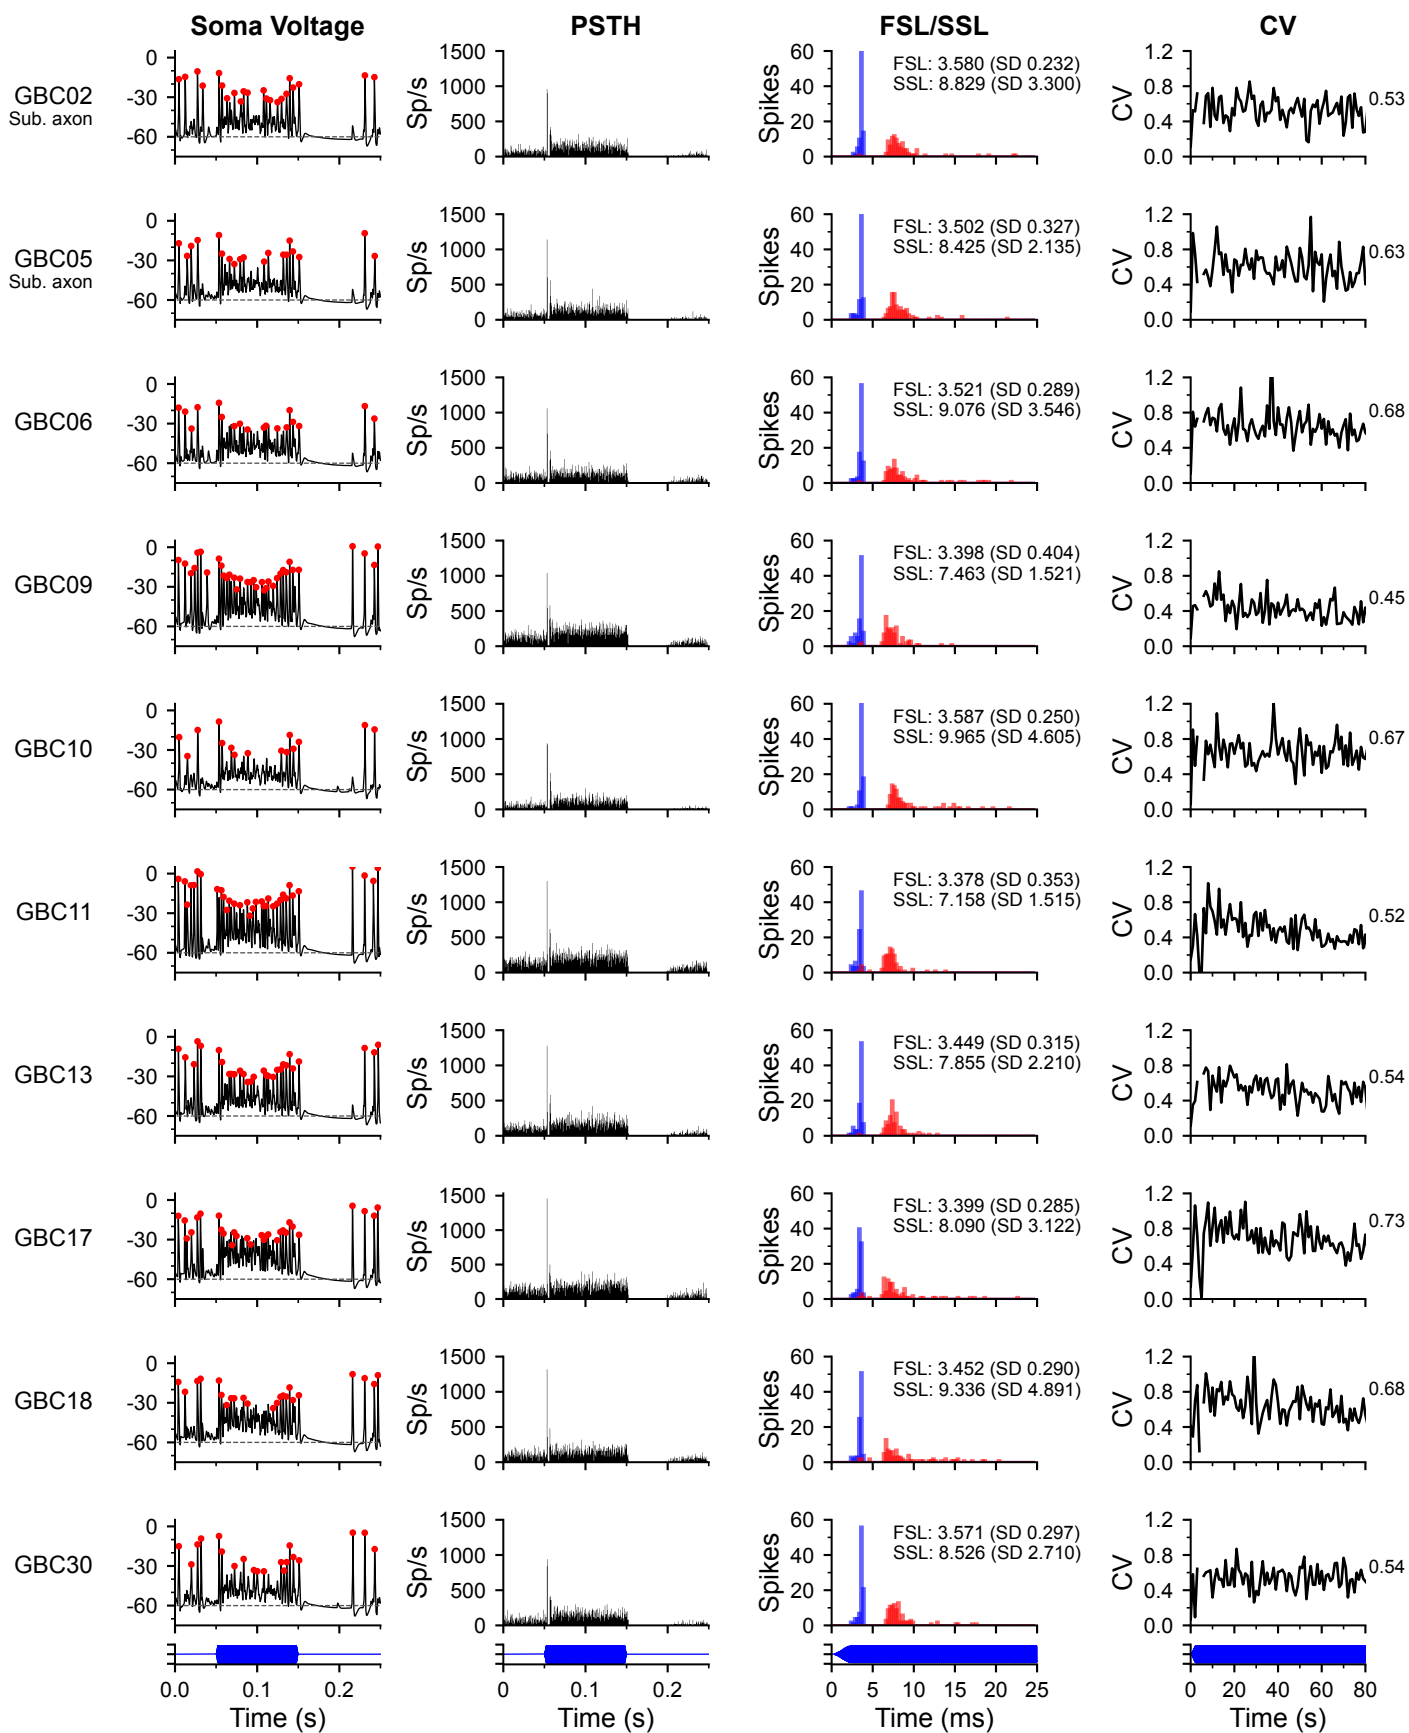

Supplement: supp [file elife-83393-supp-v1.zip]

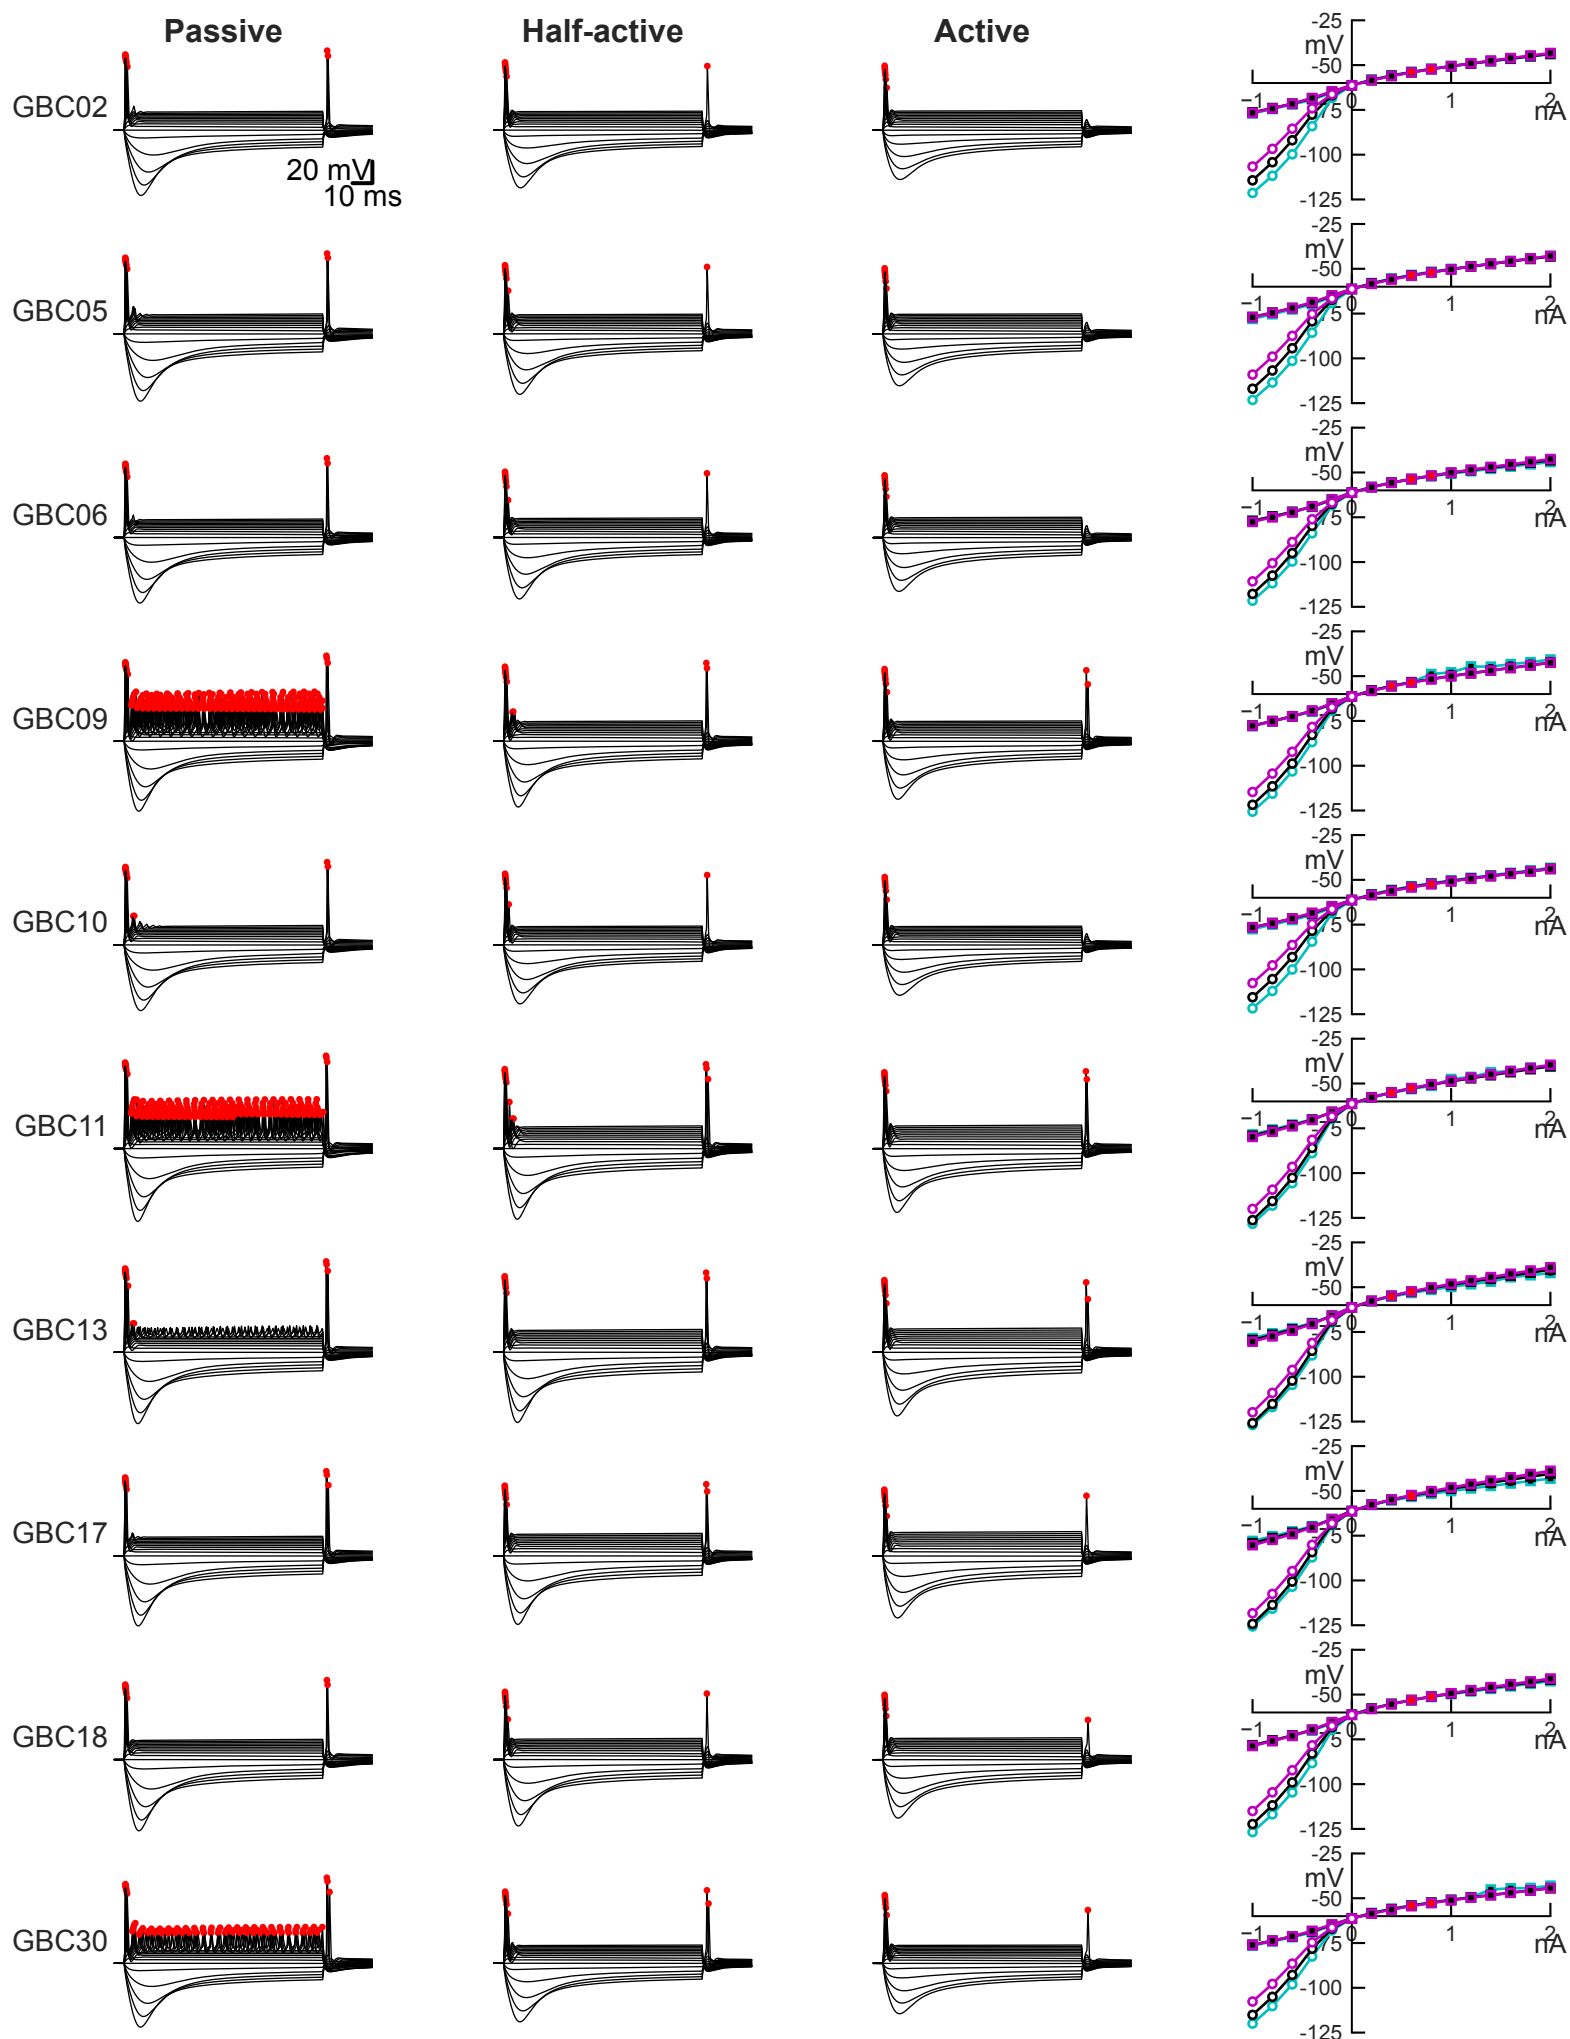

Supplement: supp [file elife-83393-supp-v1.zip]

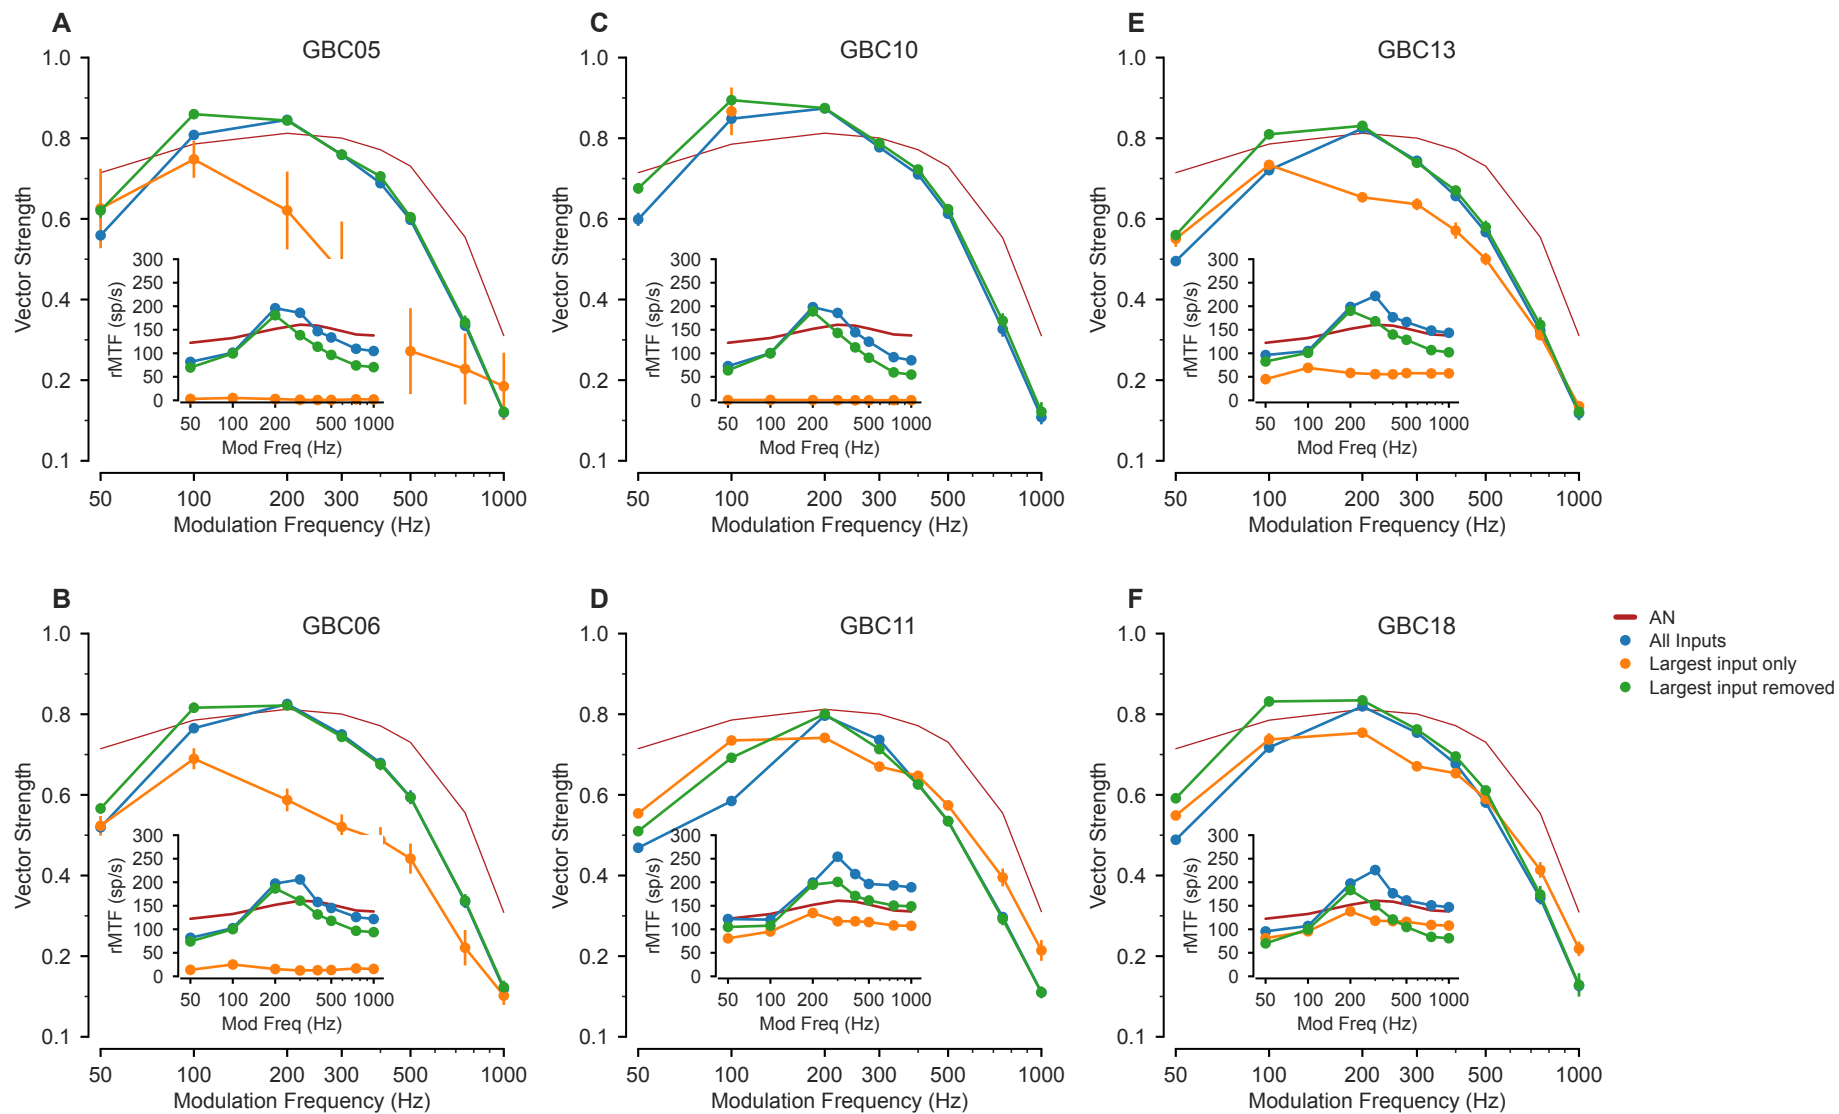

Supplement: supp [file elife-83393-supp-v1.zip]

## Spontaneous Activity

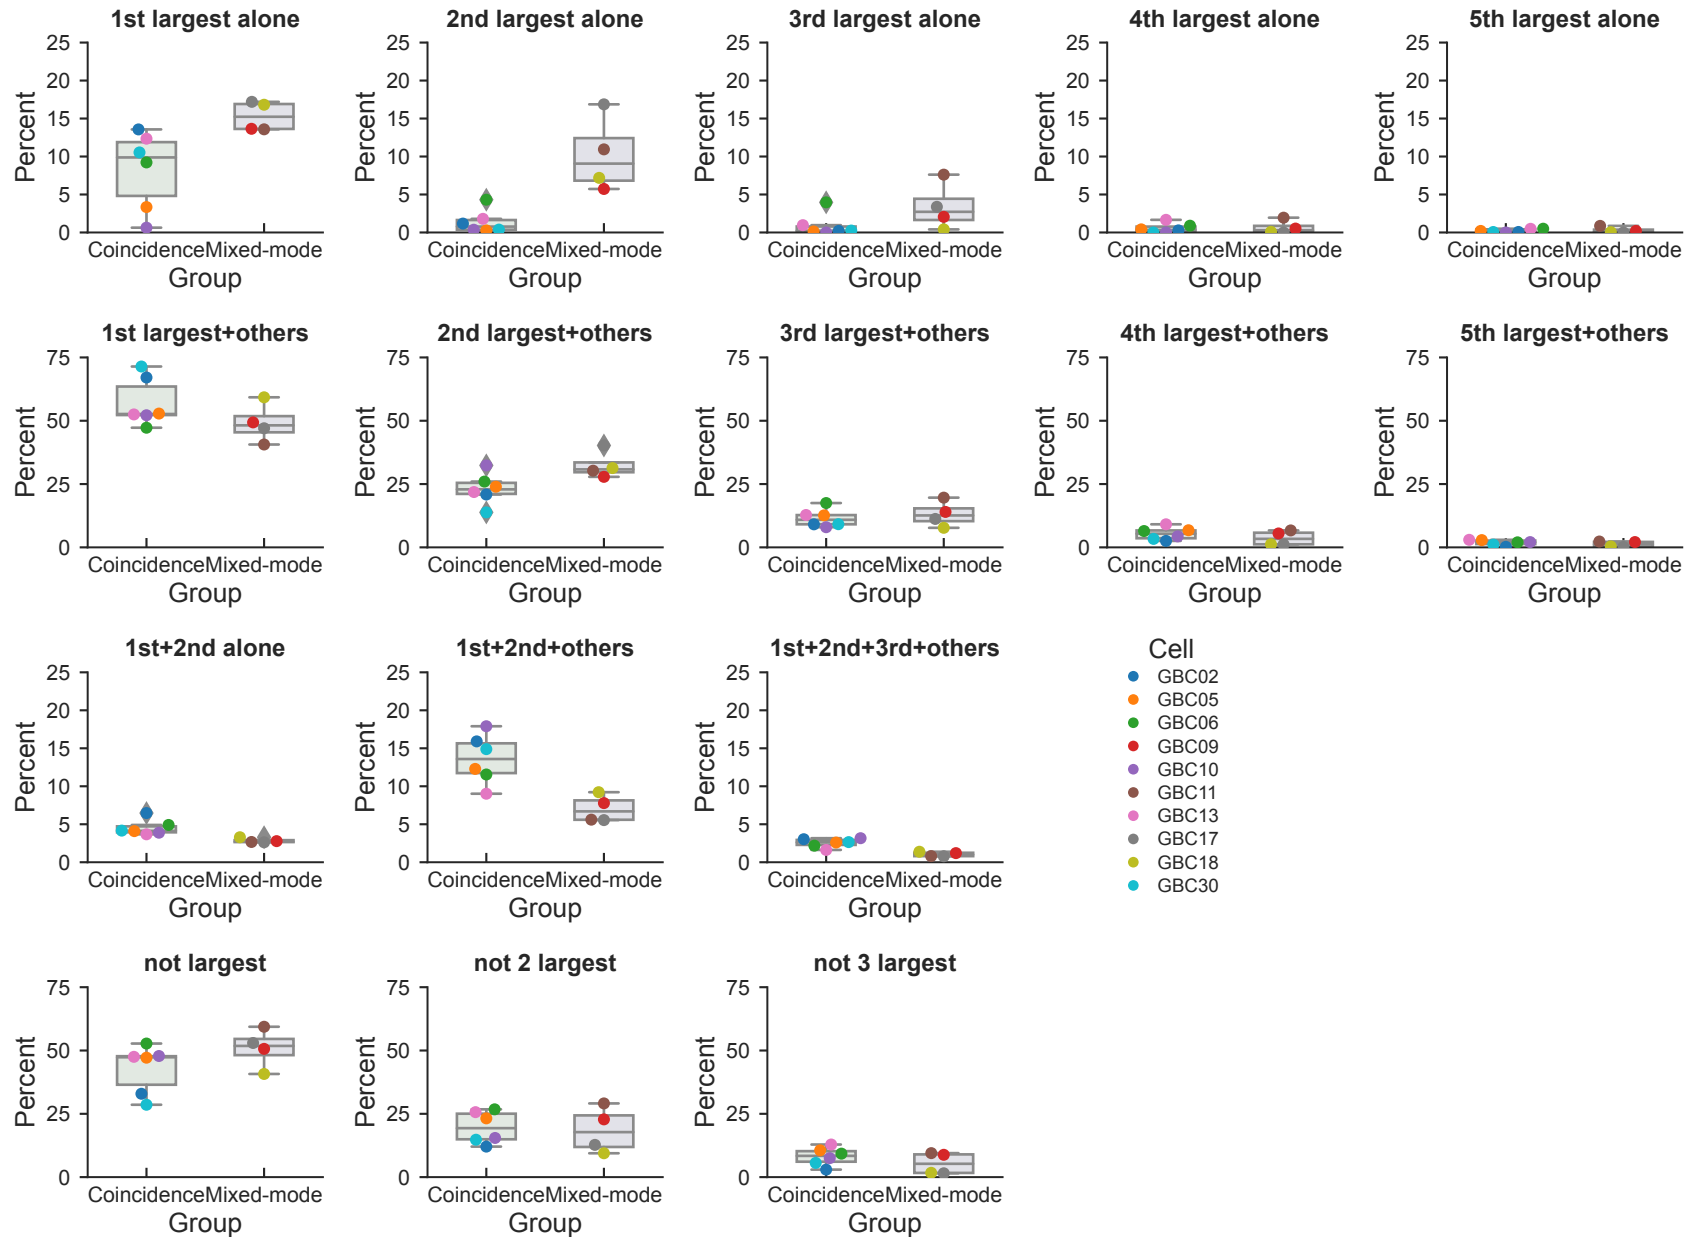

Supplement: supp [file elife-83393-supp-v1.zip]

**GBC02**  
**L**

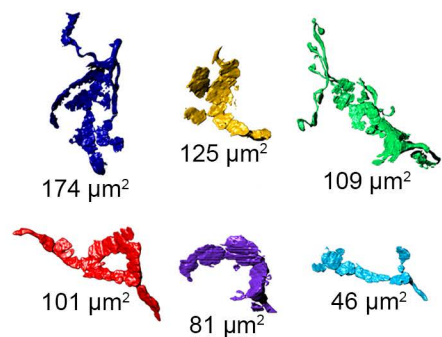

**GBC30**  
**M**

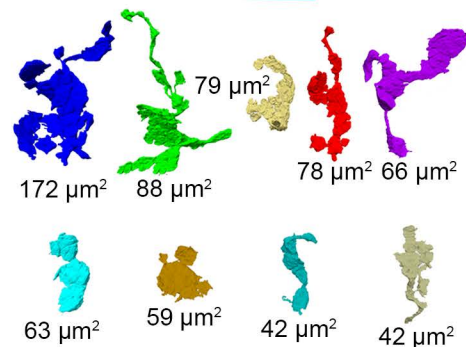

**GBC20**

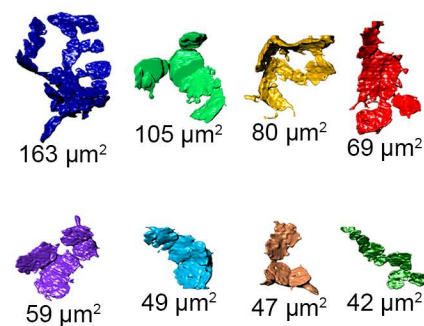

**GBC06**  
**L**

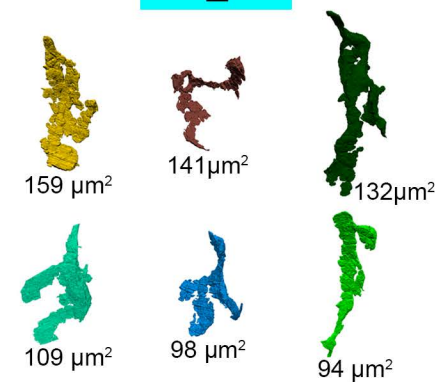

**GBC29**

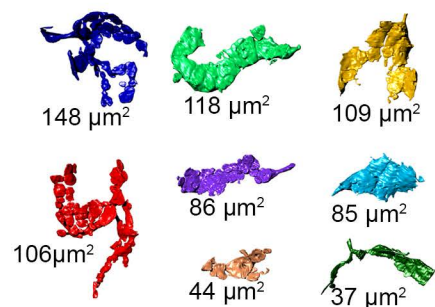

**GBC13**  
**M**

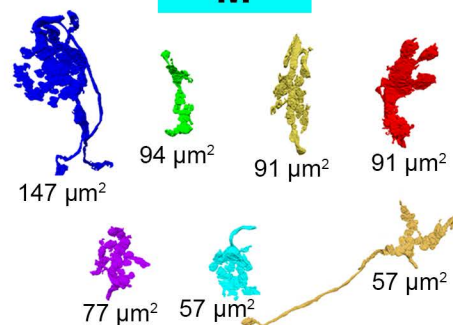

**GBC05**  
**D**

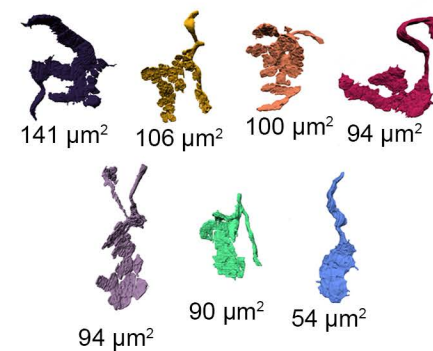

**GBC12**

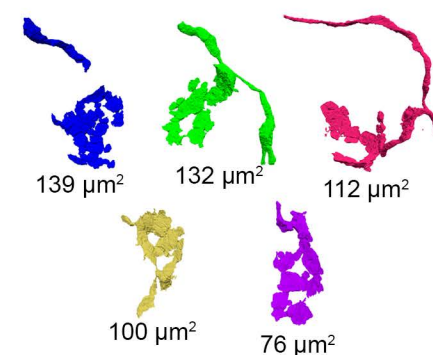

**GBC10**  
**D**

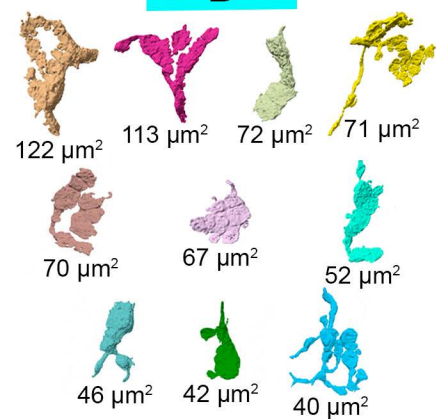

**GBC19**

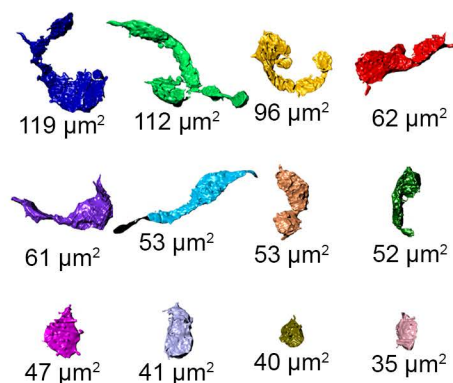

**GBC22**

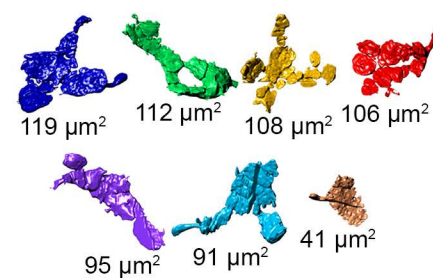

**GBC21**

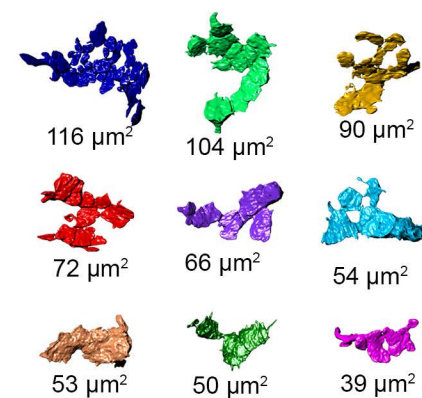

Supplement: supp [file elife-83393-supp-v1.zip]

Passive

Half-active

Active

**A1**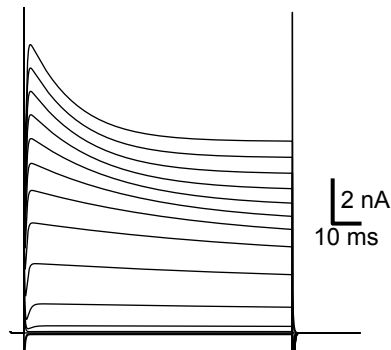**B1**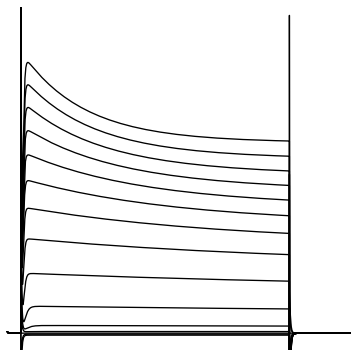**C1**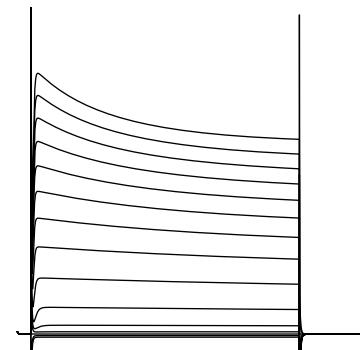**A2**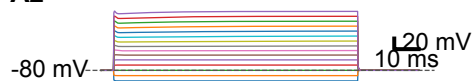**B2**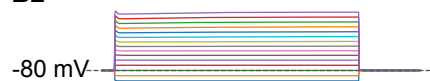**C2**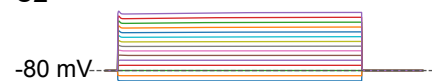**A3**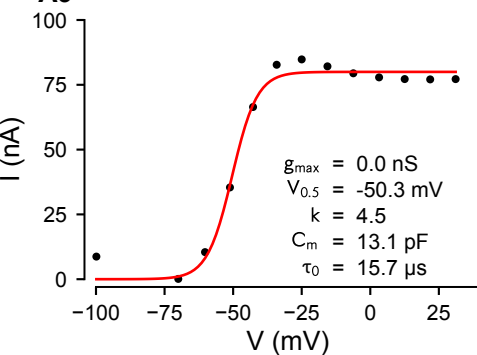**B3**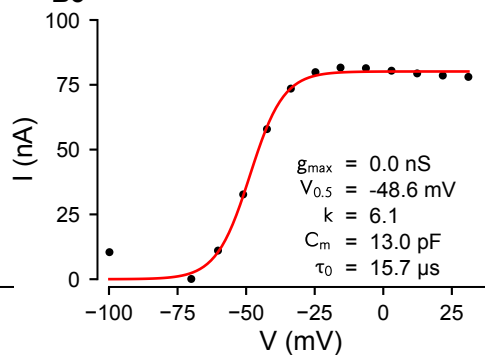**C3**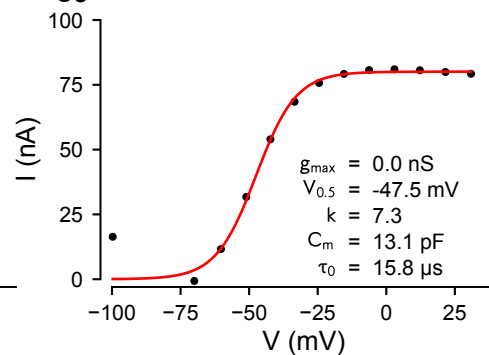**D**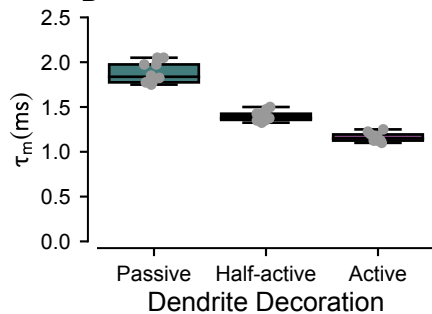**E**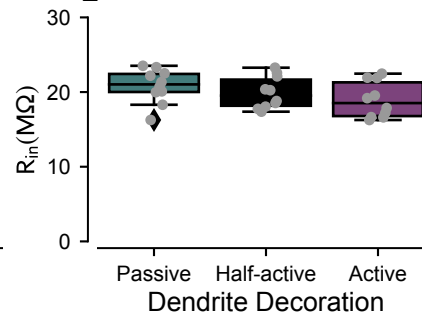

Supplement: supp [file elife-83393-supp-v1.zip]

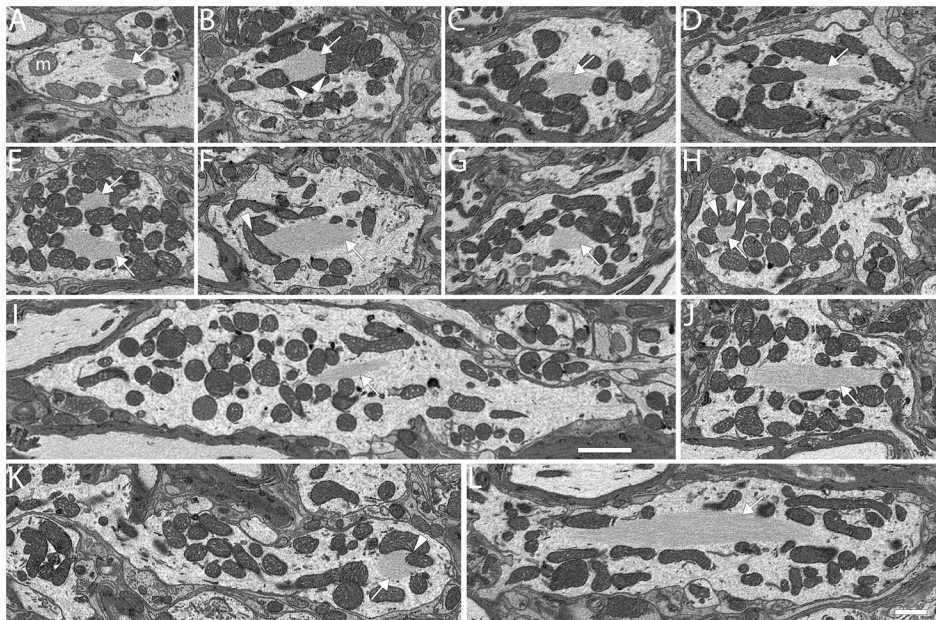

Supplement: supp [file elife-83393-supp-v1.zip]

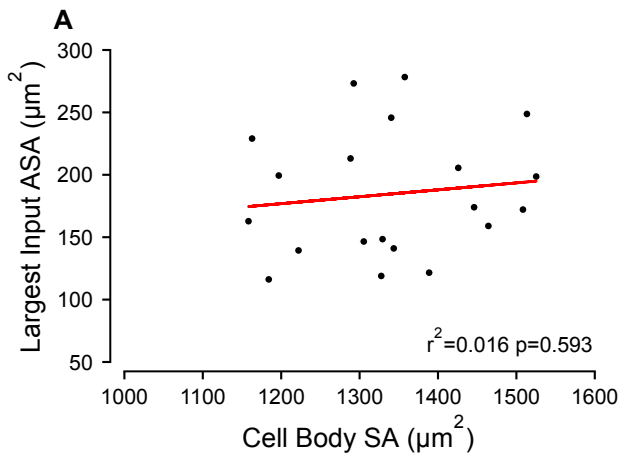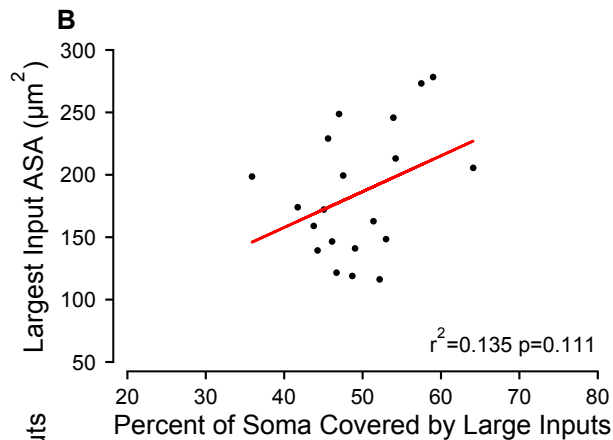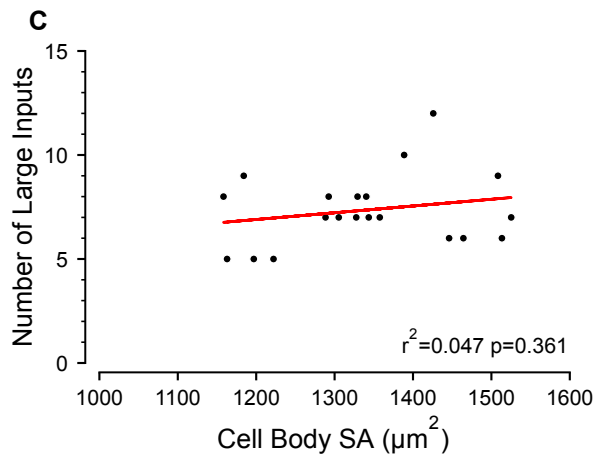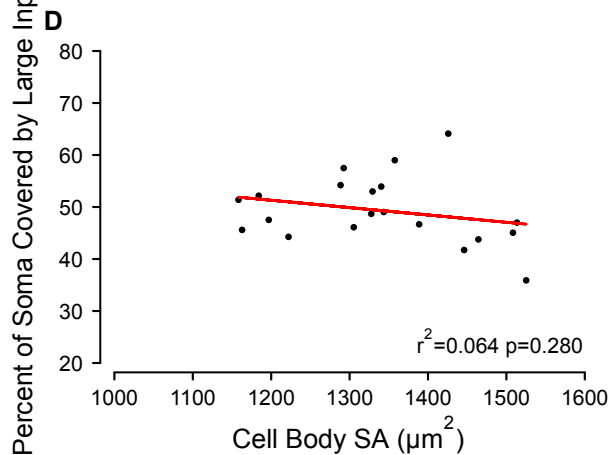

Supplement: supp [file elife-83393-supp-v1.zip]
